# Supplementary material for: Discovery and Validation of Hypermethylated Markers for Colorectal Cancer
Source: Dis Markers. 2016 Jul 14;2016:2192853. doi: 10.1155/2016/2192853 (PMC4963574; doi:10.1155/2016/2192853)
Supplement: Supplementary file 2 [file 2192853.f2.xlsx]

## Sheet: Sheet1
TABLE S2. The distribution of DMRs
	promoter	5'UTR	1stExon	Body	3'UTR	intergenic region
island	140	35	36	90	6	84
shore	170	41	11	129	23	211
shelf	46	35	5	76	10	175
opensea	273	96	65	297	60	371
